# Supplementary material for: Study on Optical and Electrical Properties of Thermally Evaporated Tin Oxide Thin Films for Perovskite Solar Cells
Source: MDPI journal article supplement (doi:10.3390/cryst11111380), 2021-11-12
Supplement: s1 [file s1]

# Study on Optical and Electrical Properties of Thermally Evaporated Tin Oxide Thin Films for Perovskite Solar Cells

Wen-Man Bin <sup>†</sup>, Wen-Han Huang <sup>†</sup>, Wei-Chun Lin <sup>\*</sup> and Hyeonseok Lee <sup>\*</sup>

Department of Photonics, National Sun Yat-sen University, Kaohsiung 80424, Taiwan;  
binnwenmann@gmail.com (W.-M.B.); versati499@gmail.com (W.-H.H.)

<sup>\*</sup> Correspondence: wclin@mail.nsysu.edu.tw ([W.-C.L.](mailto:W.-C.L.)); hslee611@mail.nsysu.edu.tw (H.L.)

<sup>†</sup> These authors contributed equally to this work.

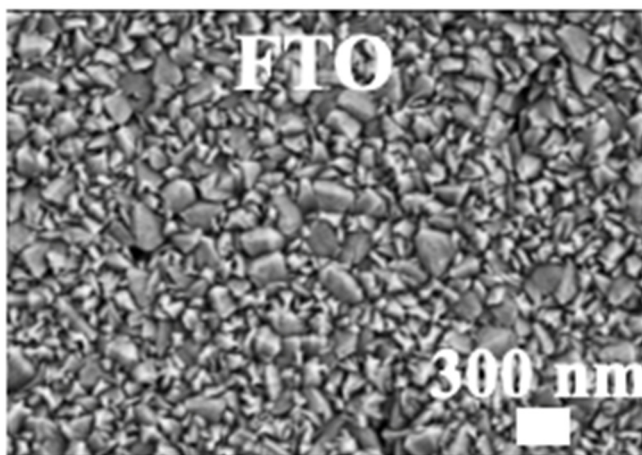

**Figure S1.** Surface morphology of FTO substrate by SEM.

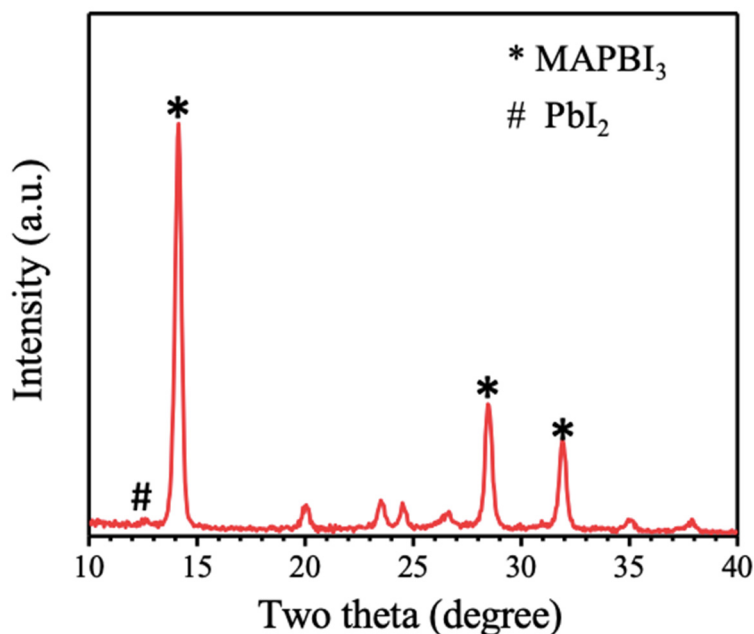

**Figure S2.** X-ray diffraction pattern for the perovskite films on the 100nm-thick SnO<sub>2</sub> films annealed at 300°C.

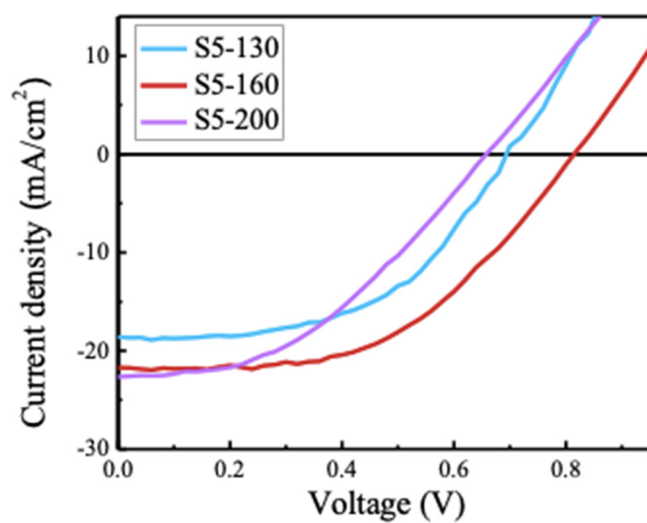

**Figure S3.** The J-V curve of PSCs with 500 °C annealed SnO<sub>2</sub> with varied thickness.

**Table S1.** The performance of PSCs with 500 °C annealed SnO<sub>2</sub> with varied thickness.

| Sample Names | Thickness of SnO <sub>x</sub> | J <sub>sc</sub> (mA/cm <sup>2</sup> ) | V <sub>oc</sub> (mV) | Fill Factor | PCE(%) | R <sub>s</sub> (Ω) | R <sub>sh</sub> (Ω) |
|--------------|-------------------------------|---------------------------------------|----------------------|-------------|--------|--------------------|---------------------|
| S5-130       | 130nm                         | 18.59                                 | 695                  | 0.53        | 6.87   | 116                | 1620                |
| S5-160       | 160nm                         | 21.71                                 | 816                  | 0.51        | 9.05   | 134                | 1451                |
| S5-200       | 200nm                         | 22.66                                 | 658                  | 0.42        | 6.3    | 145                | 4106                |
